# Supplementary material for: Infant Alveolar Macrophages Are Unable to Effectively Contain Mycobacterium tuberculosis
Source: Front Immunol. 2020 Mar 24;11:486. doi: 10.3389/fimmu.2020.00486 (PMC7107672; doi:10.3389/fimmu.2020.00486)
Supplement: Supplementary file 1 [file Data_Sheet_1.pdf]

**Supplementary Table 1. Bronchoscopy Diagnosis of Infant Participants and Smoking Status of Adult Participants**

|                        | Bronchoscopy Diagnosis of Infants<br>(n) |                |               |                | Smoking Status of Adults<br>(n) |    |         |
|------------------------|------------------------------------------|----------------|---------------|----------------|---------------------------------|----|---------|
|                        | Normal                                   | Laryngomalacia | Laryngeal web | Tracheomalacia | Never                           | Ex | Current |
| <b>Figure 1 (n=7)</b>  | 5                                        | 2              | 0             | 0              | 3                               | 2  | 2       |
| <b>Figure 2 (n=7)</b>  | 4                                        | 2              | 0             | 1              | 2                               | 3  | 2       |
| <b>Figure 3 (n=6*)</b> | 4                                        | 0              | 1             | 1              | 3                               | 1  | 2       |

\* Bronchoalveolar lavage from 2 infants and 2 adult participants yielded sufficient AMφs for use in both the freshly isolated and Mtb-stimulated RNA-Seq experiments.

**Supplementary Table 2. List of transcripts included in GSEA of Mtb-stimulated infant/adult AM $\phi$  that have previously shown to be upregulated in AM $\phi$  in response to H37Rv Mtb relative to the avirulent H37Ra Mtb strain (1)**

|                 |
|-----------------|
| <i>GADD45A</i>  |
| <i>AKAP2</i>    |
| <i>CCL3</i>     |
| <i>CD44</i>     |
| <i>CSF2*</i>    |
| <i>CXCL1*</i>   |
| <i>CXCL2*</i>   |
| <i>DUSP5</i>    |
| <i>EHD1</i>     |
| <i>EREG*</i>    |
| <i>G0S2*</i>    |
| <i>HIVEP2</i>   |
| <i>HSPA1A</i>   |
| <i>HSPA1B</i>   |
| <i>IER3</i>     |
| <i>IL23A*</i>   |
| <i>IL6</i>      |
| <i>IVNS1ABP</i> |
| <i>LAMP3</i>    |
| <i>LIMK2*</i>   |
| <i>OPTN</i>     |
| <i>PALM2</i>    |
| <i>PHLDA2</i>   |
| <i>PLA2G4A*</i> |
| <i>PTGS2*</i>   |
| <i>RGS1</i>     |
| <i>SEC24A</i>   |
| <i>SERPINB9</i> |
| <i>STK17A</i>   |
| <i>TFPI2*</i>   |
| <i>TM4SF1</i>   |
| <i>TNF</i>      |
| <i>TNFAIP2</i>  |
| <i>TNIP1</i>    |
| <i>TRAF1*</i>   |
| <i>XBPI</i>     |

\*Genes that were SDE between Mtb-stimulated infant vs adult AM $\phi$ s (all higher expression in infants)

**Supplementary Table 3. List of transcripts included in GSEA of Mtb-stimulated infant/adult AMφ that have previously shown to be upregulated in Mtb-stimulated monocyte-derived macrophages from patients who had previously recovered from TB meningitis and pulmonary TB, relative to equivalents from patients with latent TB (2)**

|                |
|----------------|
| <i>CCL1</i>    |
| <i>CCL20</i>   |
| <i>CCR2</i>    |
| <i>CXCL5</i> * |
| <i>EREG</i> *  |
| <i>HAS1</i> *  |
| <i>IL12B</i>   |
| <i>IL23A</i> * |
| <i>INHBA</i>   |
| <i>MMP1</i> *  |
| <i>PTGS2</i> * |
| <i>TNIP3</i>   |

\*Genes that were SDE between Mtb-stimulated infant vs adult AMφs (all higher expression in infants)

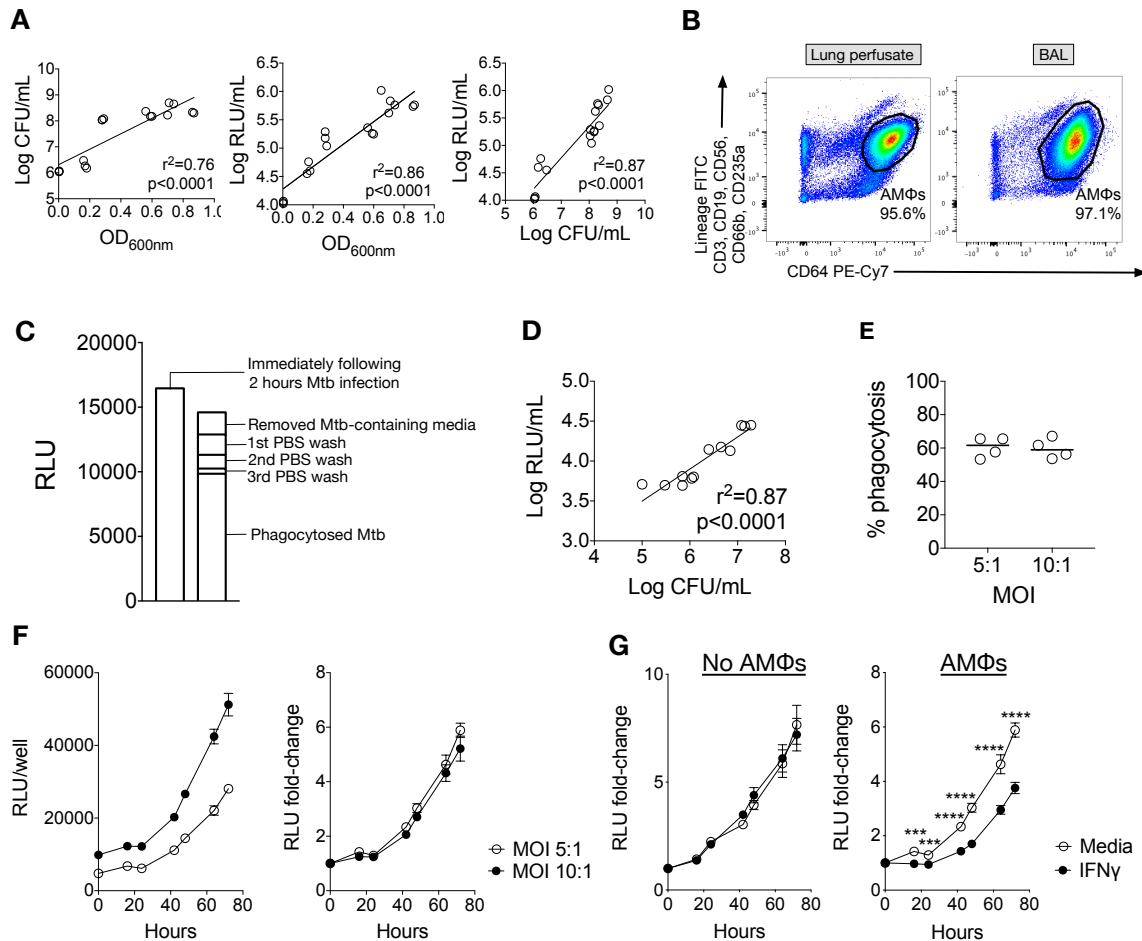

**Supplementary Figure 1. Autoluminescent reporter *M. tuberculosis* facilitates the accurate measurement of phagocytosis and capacity to restrict mycobacterial replication by human AMΦs.** (A) Correlation of CFU/mL and optical density (OD) with autoluminescence (RLU, relative light units) of Mtb-LuxG13 in liquid 7H9 culture; (B) Representative flow cytometry showing purity of AMΦs after 1-hour adherence of ex-vivo BAL cells (left) and BAL (right) cells followed by three PBS washes. (C) Autoluminescence of ex-vivo BAL AMΦs measured immediately following a 2-hour incubation with Mtb-LuxG13 at MOI 5:1 (left histogram), compared with a stack of measurements (right histogram) comprising of: the media removed from the same wells after the 2-hour incubation, three serial PBS washes and the remaining autoluminescence (representing phagocytosed intracellular bacilli). Data represents median of three replicate wells from a single donor. (D) Correlation of intracellular bacillary load and autoluminescence of ex-vivo BAL AMΦs from a single donor after 2-hour infection with Mtb-LuxG13 at MOI 5:1; (E) Comparison of proportion of phagocytosed Mtb-LuxG13 at MOI 5:1 and 10:1 in four replicate wells of ex-vivo BAL AMΦ from a single donor; (F) Comparative kinetics of mycobacterial replication of ex-vivo BAL AMΦs infected with MOI 10:1 or 5:1, expressed as serial RLU measurements over 72 hours (left graph shows absolute values, right graph shows fold change relative to zero time point); (G) Effect of IFNγ on mycobacterial replication, expressed as fold-change of serial RLU measurements of parallel wells of ex-vivo BAL AMΦ infected with Mtb-LuxG13 at MOI 5:1 (right graph) or bacillary inoculum alone without AMΦ (left graph), with/without recombinant human IFNγ 50ng/mL. Data points/bars represent median/range of RLU fold-change from four replicate wells relative to zero time point. Significance determined by 2-way ANOVA with correction for multiple comparison by Benjamini-Hochberg method.

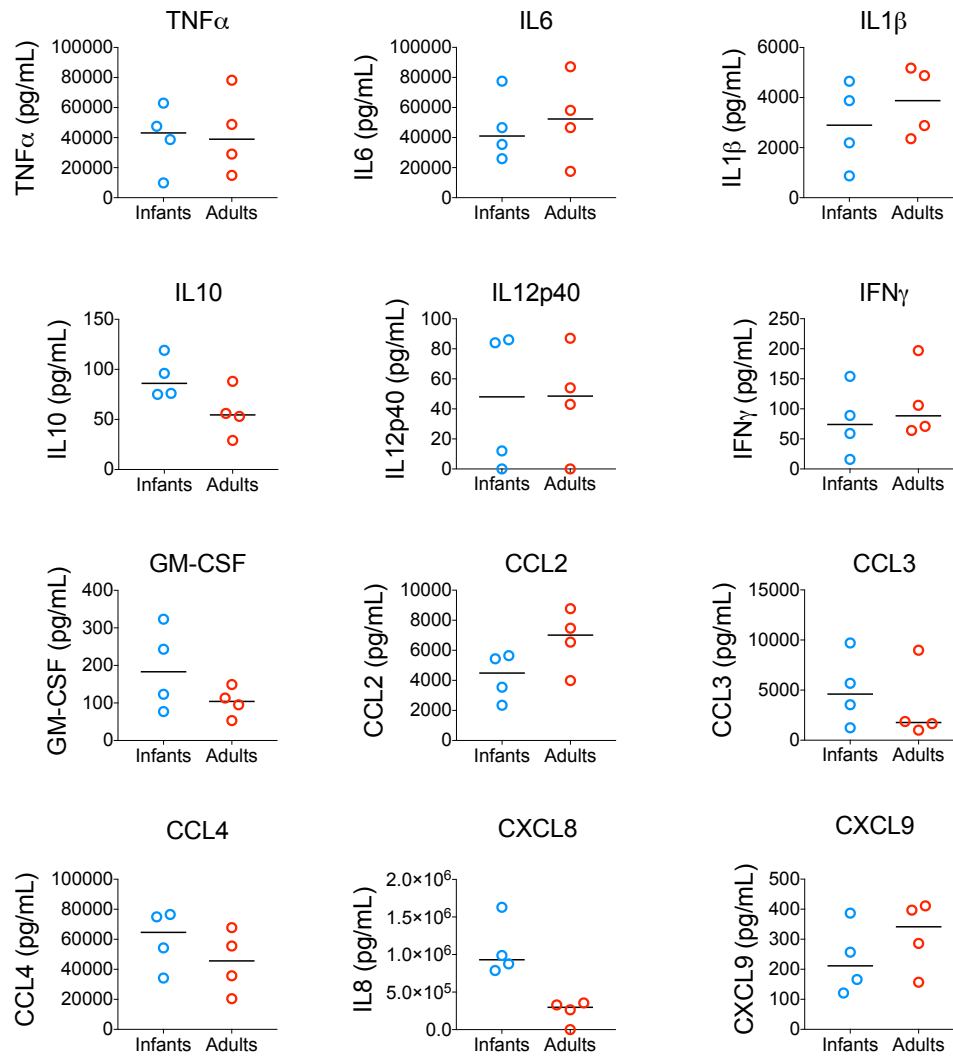

**Supplementary Figure 2. Infant AM $\Phi$ s exhibit dysregulated chemokine production.** Soluble inflammatory mediator measurement by cytokine bead array of culture supernatants from Mtb H37Rv-stimulated infant vs adult AM $\Phi$ s. Bar denotes median.

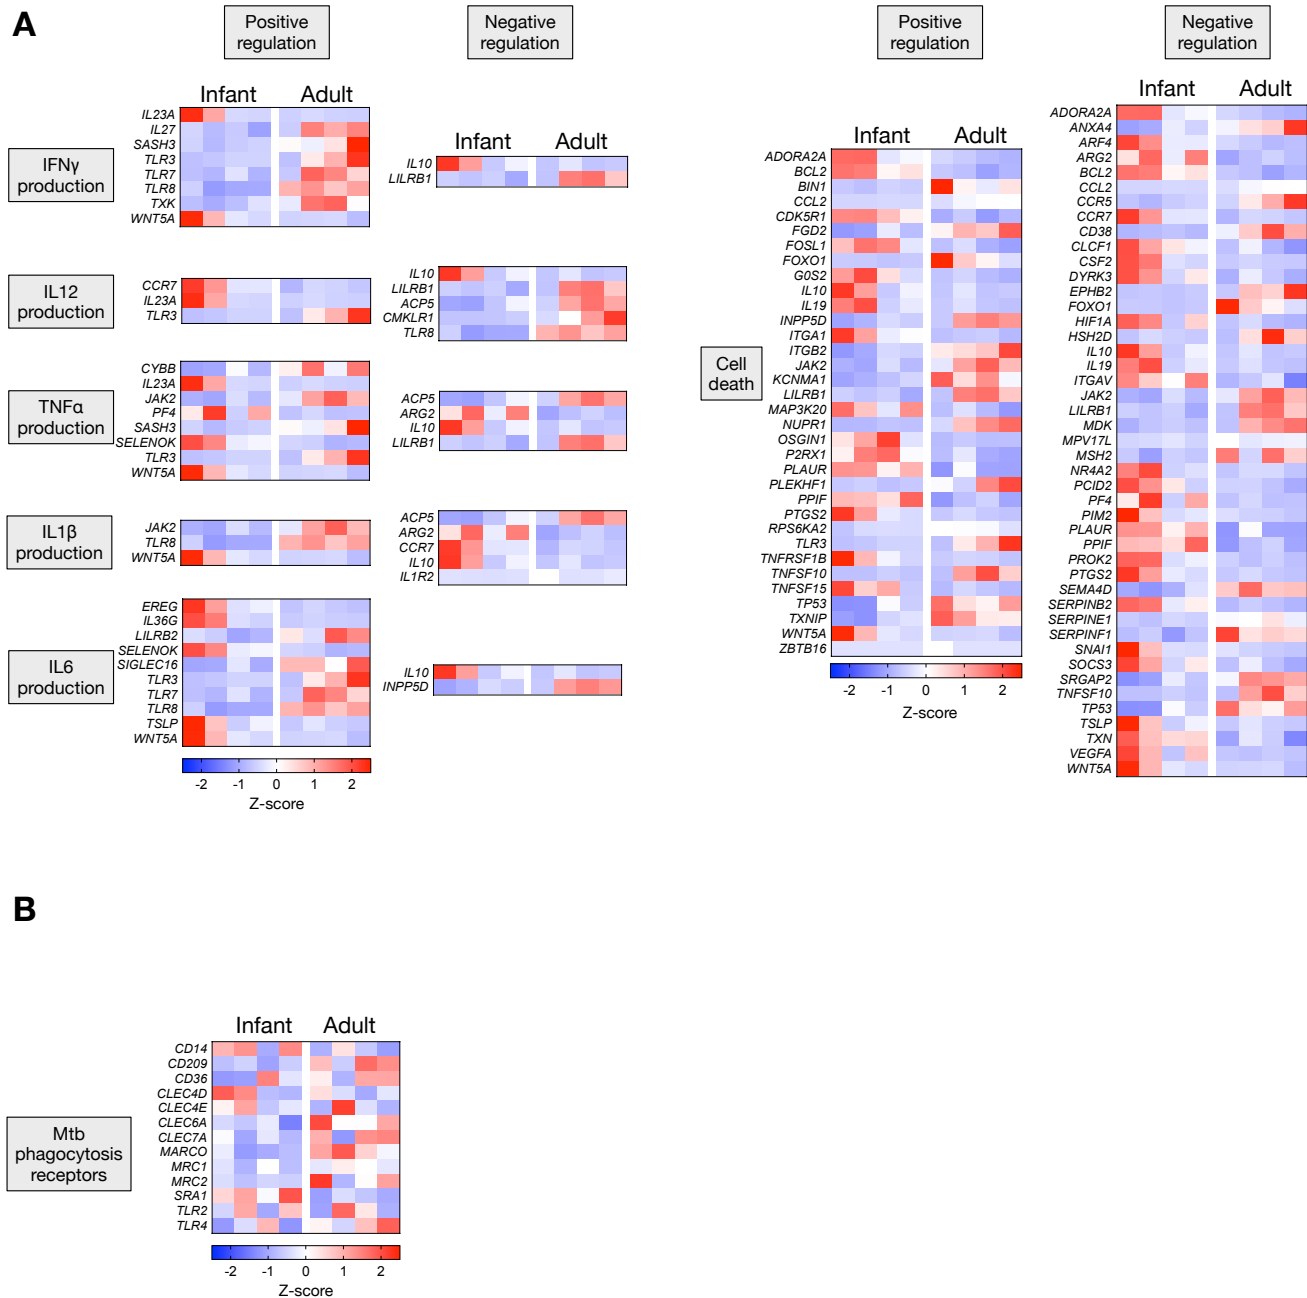

**Supplementary Figure 3. Mtb-stimulated infant AM $\phi$ s do not exhibit polarized expression of genes involved in Mtb phagocytosis, innate cytokine production or cell death (A)** Expression profile of SDE genes of Mtb-stimulated infant vs adult AM $\phi$ s involved in regulating production of IFN $\gamma$  (GO:0032649), IL12 (GO:0032655), TNF $\alpha$  (GO:0032680), IL1 $\beta$  (GO:0032651) and IL6 (GO:0032675), and regulating cell death (GO:0010941). **(B)** Expression profile of SDE genes of Mtb-stimulated infant vs adult AM $\phi$ s encoding Mtb phagocytosis receptors. Scale intensity represents Z-score.

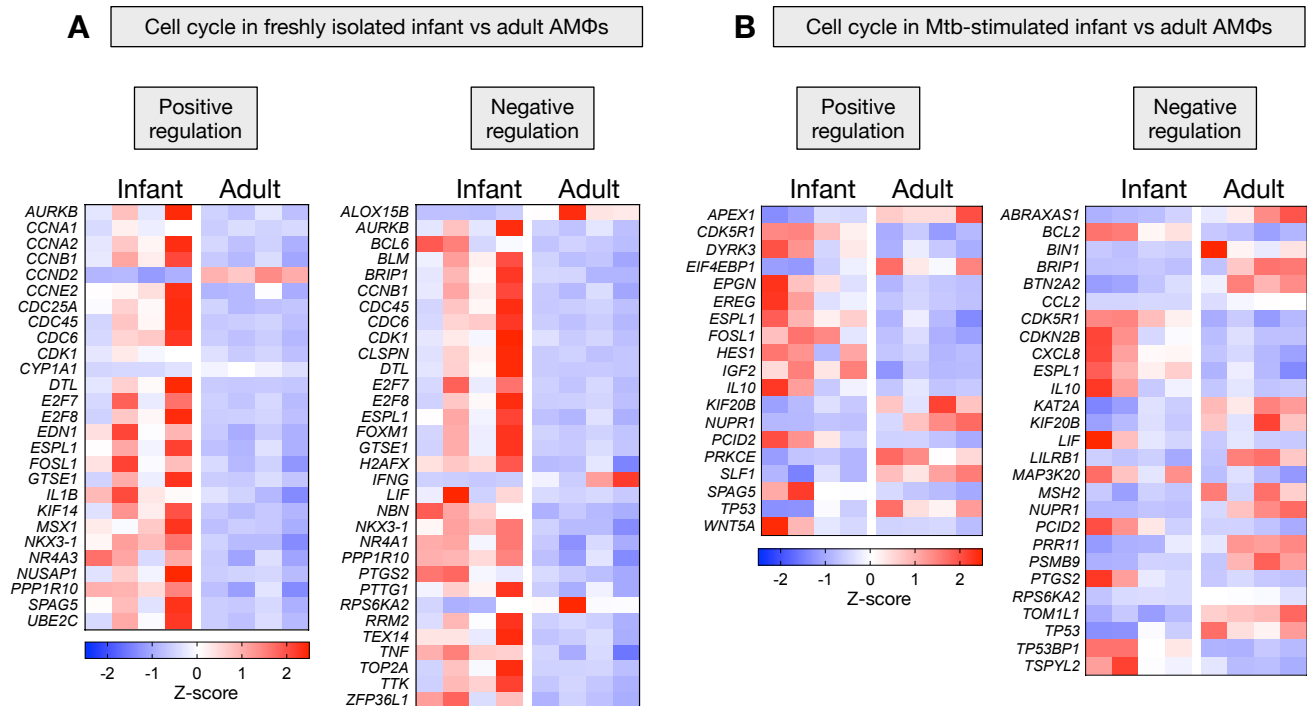

**Supplementary Figure 4. Freshly isolated, but not Mtb-stimulated, infant AMΦs exhibit higher expression of genes involved in the regulation of cell cycle.** Expression profile of SDE genes of infant vs adult AMΦs involved in the regulation of cell cycle (GO: 0045787 and 0045786) from (A) freshly isolated cells; and (B) Mtb-stimulated cells. Scale intensity represents Z-score.

**Supplementary Video 1.** Obtaining BAL during rigid bronchoscopy of an infant for investigation of suspected airway abnormality. The larynx was intubated under direct vision with a size 5Fr suction catheter. The suction catheter was advanced into the trachea alongside an endoscope to facilitate direct visualisation of endobronchial positioning. Sterile 0.9% sodium chloride solution was instilled into the suction catheter via a 16G intravenous catheter (JELCO, Smiths Medical). Following instillation, saline was immediately recovered into a sterile trap by applying gentle suction, and the procedure repeated on the opposite bronchus.

## Supplementary References

1. Silver RF, Walrath J, Lee H, Jacobson BA, Horton H, Bowman MR, et al. Human alveolar macrophage gene responses to Mycobacterium tuberculosis strains H37Ra and H37Rv. *Am J Respir Cell Mol Biol* (2009) 40(4):491-504. Epub 2008/09/13. doi: 10.1165/rcmb.2008-0219OC. PubMed PMID: 18787177; PubMed Central PMCID: PMCPMC2660564.
2. Thuong NT, Dunstan SJ, Chau TT, Thorsson V, Simmons CP, Quyen NT, et al. Identification of tuberculosis susceptibility genes with human macrophage gene expression profiles. *PLoS Pathog* (2008) 4(12):e1000229. Epub 2008/12/06. doi: 10.1371/journal.ppat.1000229. PubMed PMID: 19057661; PubMed Central PMCID: PMCPMC2585058.
